# Supplementary material for: Both sexes produce sounds in vocal fish species: testing the hypothesis in the pygmy gourami (labyrinth fishes)
Source: Oxford University Press journal article supplement (doi:10.1242/jeb.223750), 2020-04-16
Supplement: jeb223750supp.pdf [file jeb223750supp.pdf]

## Supplementary information

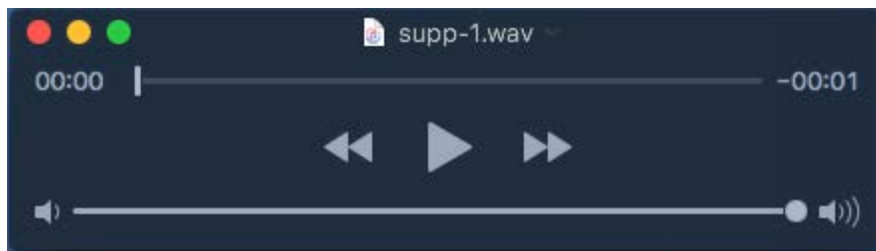

### Audio 1

Two croaking sounds of a male *Trichopsis pumila* emitted during an agonistic interaction. Low-pass filter: 3.5 kHz.
